# Supplementary material
Source: Springer Nature journal article supplement (https://www.springermedizin.de/resource/supplementary/13058_2013_3560_MOESM6_ESM.pdf/9704154)

(a)

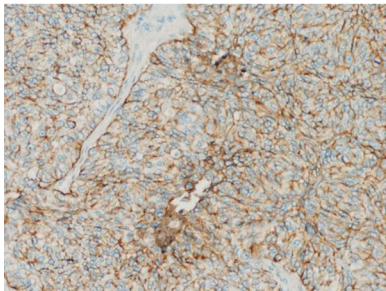

(b)

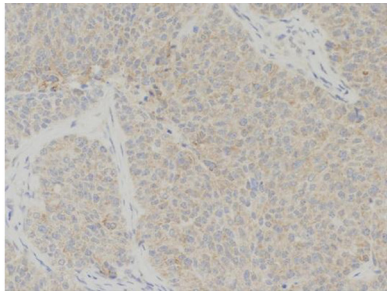

(c)

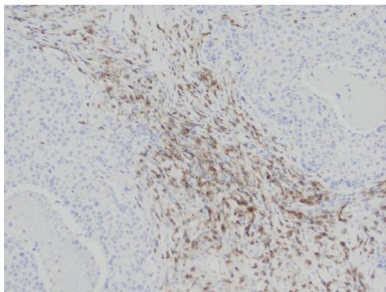

(d)

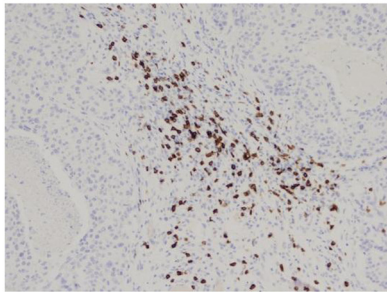

Supplement: MOESM6 [file 9704154]
